# Supplementary material for: Adoption of Emergency Department–Initiated Buprenorphine for Patients With Opioid Use Disorder: Secondary Analysis of a Cluster Randomized Trial
Source: PubMed Central journal article supplement (PMC10638655; doi:10.1001/jamanetworkopen.2023.42786), 2023-11-10
Supplement: jamanetwopen-e2342786-s003.pdf [file jamanetwopen-e2342786-s003.pdf]

## Data Sharing Statement

Gao. Adoption of Emergency Department–Initiated Buprenorphine for Patients With Opioid Use Disorder. *JAMA Netw Open*. Published November 14, 2023.

doi:10.1001/jamanetworkopen.2023.42786

### Data

**Data available:** Yes

**Data types:** Deidentified participant data, Data dictionary

**How to access data:** Data Available: yes Type: data deidentified at patient, provider, and site level; data dictionary How to access: - EMBED trial Public repository:

<https://www.icpsr.umich.edu/web/NAHDAP/studies/38568/summary> - Care team data available via [andrew.loza@yale.edu](mailto:andrew.loza@yale.edu) When available: since 11/2022

**When available:** With publication

### Supporting Documents

**Document types:** Statistical/analytic code

**How to access documents:** Supporting documents Available: yes Types: statistical/analytic code How to access: [andrew.loza@yale.edu](mailto:andrew.loza@yale.edu) When available: beginning 6/1/2023

**When available:** With publication

### Additional Information

**Who can access the data:** Who can access the data: public dataset is available. For additional data on care teams, researchers whose proposed use of the data has been approved by the EMBED team

**Types of analyses:** For a specified scientific purpose

**Mechanisms of data availability:** After approval of a proposal
